# Supplementary material for: A positive approach to adolescent sexual health promotion: a qualitative evaluation of key stakeholder perceptions of the Australian Positive Adolescent Sexual Health (PASH) Conference
Source: Springer Nature journal article supplement (doi:10.1186/s12889-019-6993-9), 2019-06-03
Supplement: MOESM1 [file 16767960]

## Interview Schedule

|                                                                       |                                                                                                                                                                                                                                                                                                                                                                                                                                                                                                                                                                                                                                                                                                                                                                                                                                                                                                                                                                                                                                                                                                                                                                                                                                                                                                                                                                                                                                                                                                                                                                                                                                                                                                                                                                                                                                                                                                          |
|-----------------------------------------------------------------------|----------------------------------------------------------------------------------------------------------------------------------------------------------------------------------------------------------------------------------------------------------------------------------------------------------------------------------------------------------------------------------------------------------------------------------------------------------------------------------------------------------------------------------------------------------------------------------------------------------------------------------------------------------------------------------------------------------------------------------------------------------------------------------------------------------------------------------------------------------------------------------------------------------------------------------------------------------------------------------------------------------------------------------------------------------------------------------------------------------------------------------------------------------------------------------------------------------------------------------------------------------------------------------------------------------------------------------------------------------------------------------------------------------------------------------------------------------------------------------------------------------------------------------------------------------------------------------------------------------------------------------------------------------------------------------------------------------------------------------------------------------------------------------------------------------------------------------------------------------------------------------------------------------|
| Background information on interviewee                                 | <ul style="list-style-type: none"> <li>• Male/ female/other</li> <li>• Age: _____ (years)</li> <li>• Involvement in PASH conference: Organiser/ presenter/ teacher/ PEEP/ worker</li> </ul>                                                                                                                                                                                                                                                                                                                                                                                                                                                                                                                                                                                                                                                                                                                                                                                                                                                                                                                                                                                                                                                                                                                                                                                                                                                                                                                                                                                                                                                                                                                                                                                                                                                                                                              |
| Strengths/ enablers of PASH                                           | <ul style="list-style-type: none"> <li>• What in your opinion were strengths of the conference? (<i>Prompt when required: Can you give an example?</i>)</li> <li>• How did the conference enable engagement of <b>young people</b>?</li> <li>• How did the conference help young people increase their <b>knowledge</b> on:             <ul style="list-style-type: none"> <li>• Sexuality and sexual health</li> <li>• Related services (mental health/drug and alcohol)</li> <li>• Access to sexual health services?</li> </ul> </li> <li>• How did the conference help young people build <b>confidence</b> in:             <ul style="list-style-type: none"> <li>• Sexuality and sexual health</li> <li>• Accessing sexual health services</li> <li>• Communicating what they want or don't want in relation to sex?</li> </ul> </li> <li>• How did the conference help young people build <b>skills</b> around:             <ul style="list-style-type: none"> <li>• Protective/Safe behaviour</li> <li>• Reduction of STI risk</li> <li>• Access to services (eg treatment or testing)</li> <li>• Communicating what they want or don't want in relation to sex?</li> </ul> </li> <li>• Were the topics covered <b>appropriate</b> and innovative in their transmission?             <ul style="list-style-type: none"> <li>• Prompts: sex and disability, legal aspects, where to get help, social media, drugs and alcohol (<i>Provide the attached list of conference topics to interviewee</i>)</li> <li>• Was the content <b>informative</b> and valuable to young people and their support system?</li> <li>• Was <b>multimedia and arts</b> based platforms used effectively for example, engagement of the byron youth theatre?</li> </ul> </li> <li>• How do the <b>PEEPs</b> (Peer Educators engaging Peers) assist in creating a positive adolescent sexual health program?</li> </ul> |
| Weaknesses/ Barriers of PASH                                          | <ul style="list-style-type: none"> <li>• What in your opinion were weaknesses of the conference and how can they be improved upon? In terms of: (<i>take prompts from previous box</i>)             <ul style="list-style-type: none"> <li>○ <b>Engaging young people?</b></li> <li>○ <b>Knowledge</b> – use above prompts</li> <li>○ Building <b>confidence</b> in – use above prompts</li> <li>○ Building <b>skills</b> around – use above prompts</li> </ul> </li> <li>• Were any of the topics covered <b>inappropriate</b> or <b>ineffective</b> in their transmission?             <ul style="list-style-type: none"> <li>○ Prompts: sex and disability, legal aspects, where to get help, social media, drugs and alcohol. (<i>Provide attached list of conference topics</i>)</li> </ul> </li> <li>• Are there elements of the <b>PEEPs</b> program that do not work or could be improved?</li> </ul>                                                                                                                                                                                                                                                                                                                                                                                                                                                                                                                                                                                                                                                                                                                                                                                                                                                                                                                                                                                            |
| Questions pertaining to key presentations, topics and community forum | <ul style="list-style-type: none"> <li>• How do you think the presentations, topics and the community forum <b>enable</b> young people and their support system (parents, teachers, workers) to build their knowledge, confidence and skills in the listed topics in dealing with sexual health and related matters? –<i>provide list</i></li> <li>• We had 13 hot topics and 5 concurrent sessions – what do you think was covered effectively? What was done well? What could be improved? (<i>Ask if not already adequately covered</i>)<br/>→ <i>Prompt each with printed list of the conference program: 13 hot topics &amp; 5 concurrent sessions &amp; community forum</i></li> </ul>                                                                                                                                                                                                                                                                                                                                                                                                                                                                                                                                                                                                                                                                                                                                                                                                                                                                                                                                                                                                                                                                                                                                                                                                             |
| Psychological and Sociological perspective of PASH                    | <ul style="list-style-type: none"> <li>• What do you consider to be the <b>personal impact</b> of the conference on young people?             <ul style="list-style-type: none"> <li>○ Prompts around interpersonal and intrapersonal impacts:                 <ul style="list-style-type: none"> <li>- emotional, intellectual, physical impacts</li> <li>- exploring their own sexuality, gender and sexual health</li> <li>- any suggestions on how this could be improved?</li> </ul> </li> </ul> </li> <li>• What <b>impact/influence</b> do you believe the PASH conference has at a <b>community level</b>? Any suggestions on how this could be improved?</li> <li>• Do you think the conference is a <b>platform</b> for young people, parents, teachers, services providers and local media to discuss issues, barriers and solutions around adolescent sexual health?             <ul style="list-style-type: none"> <li>- Prompts: Accessibility, affordability, appropriateness of services</li> </ul> </li> </ul>                                                                                                                                                                                                                                                                                                                                                                                                                                                                                                                                                                                                                                                                                                                                                                                                                                                                          |
| Recommend - ations                                                    | <ul style="list-style-type: none"> <li>• How can future PASH conferences be <b>improved</b>?             <ul style="list-style-type: none"> <li>○ To engage young people more?</li> <li>○ To improve their sexual health and wellbeing positively?</li> <li>○ Topic content?</li> <li>○ Program format?</li> </ul> </li> <li>• How can we make the conference more <b>sustainable</b>? (<i>Go beyond funding</i>)</li> </ul>                                                                                                                                                                                                                                                                                                                                                                                                                                                                                                                                                                                                                                                                                                                                                                                                                                                                                                                                                                                                                                                                                                                                                                                                                                                                                                                                                                                                                                                                             |

## Conference program

### 13 Hot Topics

- Love and Sex online
- Identity, Gender and Sexuality
- Sex and Disability
- Check Ups and where to get help
- Negotiating better sex
- Body Mods – tattoos and harm reduction
- Social Media and Sex
- Party Safe (drugs, alcohol, inhibition and risky behaviours)
- If it's not on...It's not on (Condoms as protection)
- Healthy Mind
- Contraception
- Unplanned Pregnancy
- Safer Sex – What's Legal, What's not

### Concurrent sessions:

- Let's talk about Sex – with Dolly Doctor
- Byron Youth Theater
- Embodied consent – active listening and communication
- Mind, Body, Soul
- Peer Education Engagement Program

### Community Forum
